# Supplementary material for: Technical assessment combined with an extended cost–benefit analysis for the restoration of groundwater and forest ecosystem services – an application for Grand Bahama
Source: Copernicus journal article supplement (doi:10.5194/hess-28-5459-2024), 2024-12-18
Supplement: Supplementary file 1 [file hess-28-5459-2024-supplement.pdf]

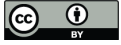

*Supplement of*

**Technical assessment combined with an extended cost–benefit analysis  
for the restoration of groundwater and forest ecosystem services –  
an application for Grand Bahama**

**Anne Imig et al.**

*Correspondence to:* Arno Rein ([arno.rein@tum.de](mailto:arno.rein@tum.de))

The copyright of individual parts of the supplement might differ from the article licence.

**Table S1. Description of the input data for the holistic analysis of potential sustainability measures.**

| <b>Input data</b>                                  | <b>Units</b>         | <b>Value/comment</b>                                    | <b>Sources</b>                                                                                                                                                                    |
|----------------------------------------------------|----------------------|---------------------------------------------------------|-----------------------------------------------------------------------------------------------------------------------------------------------------------------------------------|
| <b>Common data</b>                                 |                      |                                                         |                                                                                                                                                                                   |
| Daily precipitation rates                          | mm/day               | Monitored time series                                   | From meteorological station ECMWF ERA5 (1979-2000) and Freeport airport (2012-2021); provided by the meteorological department of the Grand Bahama Port Authority.                |
| Monthly precipitation rates at the spatial level   | mm/month             | Maps from 1970 to 2000 (resolution: 1 km <sup>2</sup> ) | WorldClim 2.1, Fick and Hijmans (2017).                                                                                                                                           |
| Land use/land cover                                | -                    | Raster file                                             | Esri (2021); Ruesch and Gibbs (2008).                                                                                                                                             |
| Digital elevation model (DEM)                      | m a.s.l.             |                                                         | Eurostat DEM (Eurostat, 2013)                                                                                                                                                     |
| Building footprints                                | Vector file          |                                                         | Provided by GBUC.                                                                                                                                                                 |
| <b>Evaluating the technical feasibility of MAR</b> |                      |                                                         |                                                                                                                                                                                   |
| Samples from a sedimentation layer                 | mm                   | grain diameter                                          | Grain size analysis according to DIN (2017) of soil sample taken on 6 <sup>th</sup> of July 2021 in the west part of Wellfield 6 (coordinates: 26.613531, -78.542213).            |
| Groundwater level measurements                     | m                    | below ground level                                      | January and October 2020 (Dokou et al., 2020) January 2021, taken by IsraAID, published in the mWaterPortal ( <a href="https://portal.mwater.co/">https://portal.mwater.co/</a> ) |
| <b>CBA common data</b>                             |                      |                                                         |                                                                                                                                                                                   |
| Discount rate                                      | %                    | 1-10                                                    | Flory (2013)                                                                                                                                                                      |
| Reference years                                    | years                | 30 (2020 to 2050)                                       | European Commission (2015)                                                                                                                                                        |
| GB households                                      | number of households | 15140                                                   | Department of Statistics of The Bahamas (2012)                                                                                                                                    |
| <b>Costs common data</b>                           |                      |                                                         |                                                                                                                                                                                   |
| Project manager costs                              | USD/hour             | 150                                                     | Phoenix Engineer (M. Gomez, personal communication, April 14, 2022)                                                                                                               |
| Project administrator costs                        | USD/hour             | 125                                                     | as before                                                                                                                                                                         |
| Work coordinator costs                             | USD/hour             | 125                                                     | as before                                                                                                                                                                         |
| Financial manager costs                            | USD/hour             | 200                                                     | as before                                                                                                                                                                         |
| Certificated expert for public procurement costs   | USD/hour             | 150                                                     | as before                                                                                                                                                                         |
| Study documentation costs                          | USD/hour             | 150                                                     | as before                                                                                                                                                                         |
| Project documentation costs                        | USD/hour             | 100                                                     | as before                                                                                                                                                                         |
| Permits obtaining costs                            | USD/hour             | 100                                                     | as before                                                                                                                                                                         |
| Advertisement campaign costs                       | USD/unit             | 2180                                                    | Miller et al. (2014)                                                                                                                                                              |

Table S1 (continued)

| Input data                                                  | Units                | Value/comment                                                                                                      | Sources                                                     |
|-------------------------------------------------------------|----------------------|--------------------------------------------------------------------------------------------------------------------|-------------------------------------------------------------|
| <b>Ecosystem services valuations: Carbon sequestration</b>  |                      |                                                                                                                    |                                                             |
| Carbon Pools                                                | t C/ha               | IPCC Tier 1 method                                                                                                 | IPCC (2014, 2006)                                           |
| Ecofloristic zones                                          | Vector file          |                                                                                                                    | Ruesch and Gibbs (2008)                                     |
| Carbon prices (social cost)                                 | USD/tCO <sub>2</sub> | 17.90; 20.00; 55.91                                                                                                | Smith et al. (2014); The World Bank (2021); U.S. EPA (1999) |
| <b>Ecosystem services valuations: Timber production</b>     |                      |                                                                                                                    |                                                             |
| Timber parcels                                              | km <sup>2</sup>      | Assumptions: 88% survival rate when planting; 12 trees/ha left during harvesting.                                  | Le et al. (2014) and Myers et al. (2004)                    |
| Percentage of harvesting                                    | %                    | 99                                                                                                                 | Myers et al. (2004)                                         |
| Mass of wood harvested                                      | ton/ha               | (calculation-based) on the density of 420 kg/m <sup>3</sup> , 15 cm diameter and 30 m height for 30 year pine tree | The Engineering ToolBox (2004) and (Sanchez, 2020)          |
| Frequency of harvest periods                                | years                | 30                                                                                                                 | Forest NSW (n.d.) (Forest NSW, n.d.)                        |
| Price of wood                                               | USD/ton              | 91                                                                                                                 | Wood Resources International (2019)                         |
| Maintenance costs                                           | USD/acre/year        | 0.70                                                                                                               | Little et al. (1977)                                        |
| Harvesting costs                                            | USD/ton              | 11                                                                                                                 | Donagh et al. (2019)                                        |
| Biomass conversion and expansion factors (BCEF)             | -                    | range of default values                                                                                            | Sharp et al. (2015)                                         |
| <b>Ecosystem services valuations: Drinking water supply</b> |                      |                                                                                                                    |                                                             |
| Water price: minimum monthly (0 – 2,000 gallons)            | USD flat rate        | 12.83                                                                                                              | GBUC (2022)                                                 |
| Water price: 2,001 – 10,000 gallons                         | USD/1000 gallons     | 4.37                                                                                                               | GBUC (2022)                                                 |
| Water price: 10,001 – 20,000 gallons                        | USD/1000 gallons     | 5.25                                                                                                               | GBUC (2022)                                                 |
| Water price: >20,000 gallons                                | USD/1000 gallons     | 6.16                                                                                                               | GBUC (2022)                                                 |
| <b>Ecosystem services valuations: Habitat provisioning</b>  |                      |                                                                                                                    |                                                             |
| Willingness to pay for habitat conservation                 | USD/ household       | 26.20                                                                                                              | Wang et al. (2021)                                          |
| <b>Ecosystem services valuations: Nature-based tourism</b>  |                      |                                                                                                                    |                                                             |
| Average tourism expenditure before hurricane events         | USD/quarter          | Depends on year and quarter                                                                                        | Bahamas Ministry of Tourism (2022)                          |
| Average tourism expenditure in 2021                         | USD/quarter          | Depends on quarter                                                                                                 | Bahamas Ministry of Tourism (2022)                          |

## **S1. Achievable recharge volume from rainwater harvesting**

The achievable recharge volume from rainwater harvesting schemes  $E_R$  [ $M^3T^{-1}$ ] in wellfield 1,3 and 4 was calculated based on recommendations by the German institute for norms (DIN, 2002):

$$E_R = A_A \times e \times h_n \times h$$

with  $A_A$ , the catchment area [ $M^2$ ],  $e$  the coefficient of yield [%] set to 0.8 for inclined hard roofs like on Grand Bahama,  $h_n$  the yearly rainfall amount [ $M$ ] and  $h$ , the hydraulic filter efficiency [%] set to 0.9 for a typical filter value.

## **S2. Method to estimate the annual average tourism expenditure**

The annual average tourism expenditure of the years before a hurricane event was calculated considering data from the years 2010 to 2015 and 2018. The total annual tourism expenditure of 2021 was estimated based on the data of the first quarter of 2021 and the averaged percentage of each quarter over multiple years (Bahamas Ministry of Tourism, 2022), as shown in Table S2.

**Table S2. Applied tourism expenditure in tourism revenue projection (Bahamas Ministry of Tourism, 2022).**

| Period                     | Percentage | Average expenditure<br>before hurricane events<br>[USD] | Estimated expenditure of<br>2021 [USD] |
|----------------------------|------------|---------------------------------------------------------|----------------------------------------|
| First quarter of the year  | 27,9%      | 40,587,623                                              | 10,540,443                             |
| Second quarter of the year | 30,1%      | 43,673,733                                              | 11,387,157                             |
| Third quarter of the year  | 22,1%      | 32,349,384                                              | 8,337,353                              |
| Fourth quarter of the year | 19,9%      | 29,052,309                                              | 7,539,175                              |
| Full year                  | 100%       | 145,663,049                                             | 37,804,128                             |

### **S3. Risk assessment related to potential MAR scheme**

Potential risks were identified for rooftop rainwater harvesting with drain trenches on Grand Bahama, based on a summary in Imig et al. (2022). Further, the risks were ranked according to the stage of MAR implementation into risks occurring in the planning phase, in the catchment of the water source, during MAR operation (infiltration, storage and recovery), or during distribution and final use (Table S3-S6). Qualitative risk scores were given using a risk matrix after Swierc et al. (2005) considering both likelihood and severity of consequences on a scale from 1 to 5 (Figure S1). Possible risk treatments were suggested by considering suggestions from DEEPWATER-CE (2020) and Nadebaum et al. (2004). The remaining risks after applying the mitigation strategies were evaluated with the risk score matrix again to determine the residual risk. Some risks occur in multiple phases, and if in the prior phase a treatment was suggested, the residual risk after treatment was used to continue with the risk in the next phase.

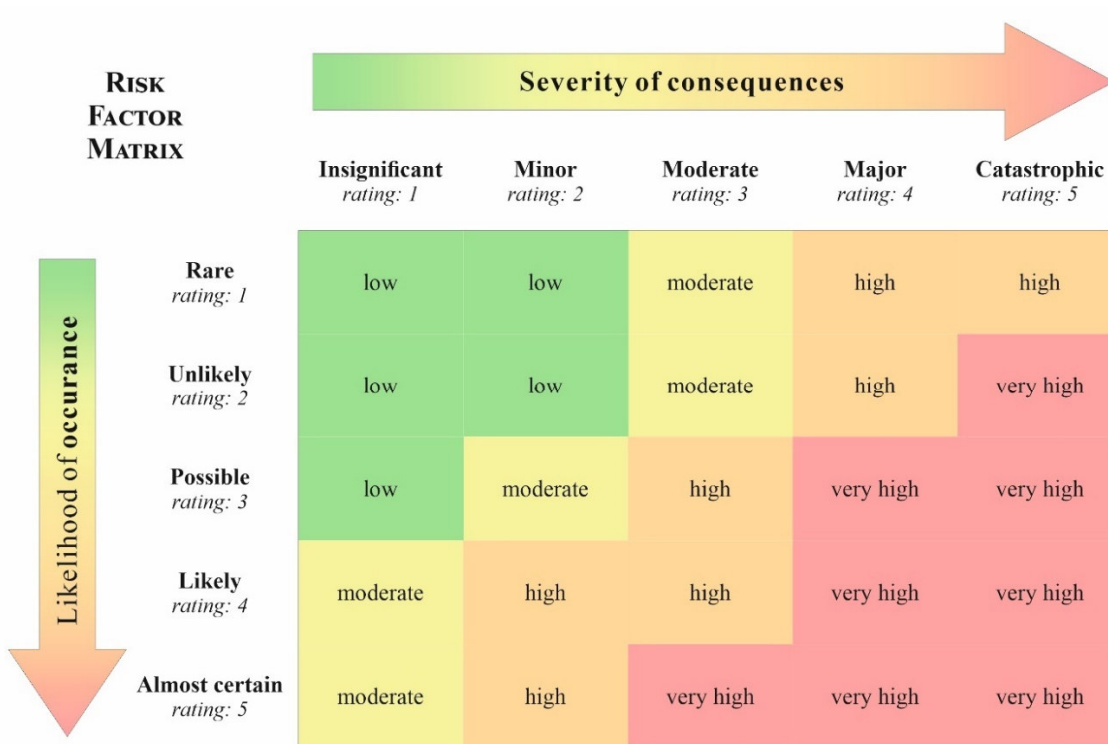

**Figure S1.:** Risk factor score matrix for qualitative risk assessment, relating the likelihood of hazards to the severity of consequences (Imig et al., 2022; after Swierc et al., 2005).

**Table S3.: Identified, analysed, and evaluated risks in the MAR planning phase; H: human health risk, T: technical risk; L: Likelihood, C: Severity of consequences.**

| Planning Phase |                                                                                                          |                        |                                              |                       |
|----------------|----------------------------------------------------------------------------------------------------------|------------------------|----------------------------------------------|-----------------------|
| Type           | Potential Risk                                                                                           | Score                  | Mitigation measure                           | Residual Score        |
| H              | Surface infiltration of saltwater or water with high pollutant loads into drain during storm event       | Very high<br>(L:5/C:3) | Sealing of storm drains at the top           | Moderate<br>(L:5/C:1) |
| H              | Inflow of saltwater or water with high pollutant loads into the gutter during storm with very high surge | High<br>(L:4/C:3)      | MAR only in elevated areas                   | Moderate<br>(L:1/C:3) |
| H              | Inflow of saltwater or water with high pollutant loads into the gutter during storm with very high surge | High<br>(L:4/C:3)      | MAR only in elevated areas                   | Moderate<br>(L:1/C:3) |
| T              | Groundwater flooding due to mounding water table                                                         | High<br>(L:3/C:3)      | Leaving enough distance to groundwater table | Moderate<br>(L:2/C:3) |
| H              | Roof material deteriorating water quality                                                                | Moderate<br>(L:4/C:1)  | Study on water quality                       |                       |
| T              | Increased carbonate dissolution causing to subsidence                                                    | Moderate<br>(L:1/C:3)  | -                                            | Moderate<br>(L:1/C:3) |
| H              | Mobilization of toxic substances from carbonates                                                         | Low<br>(L:1/C:2)       | -                                            | Low<br>(L:1/C:2)      |

**Table S4.: Identified, analysed, and evaluated risks during the runoff concentration phase in the catchment; H: human health risk, T: technical risk; L: Likelihood, C: Severity of consequences.**

| Catchment Phase |                                                                                                               |                       |                                                     |                       |
|-----------------|---------------------------------------------------------------------------------------------------------------|-----------------------|-----------------------------------------------------|-----------------------|
| Type            | Potential Risk                                                                                                | Score                 | Mitigation measure                                  | Residual Score        |
| H               | Surface infiltration of saltwater or water with high pollutant loads into drain during storm event            | Moderate<br>(L:5/C:1) | Adjustment of disinfection, dependent on monitoring | Low<br>(L:2/C:1)      |
| H               | Inflow of saltwater or water with high pollutant loads into the gutter during storm with very high surge      | Moderate<br>(L:1/C:3) | Adjustment of disinfection, dependent on monitoring | Moderate<br>(L:1/C:3) |
| H               | Microbiological contamination and turbidity due to bird fecies, dead animals, leaf litter or dust on the roof | Moderate<br>(L:3/C:2) | Adjustment of disinfection, dependent on monitoring | Low<br>(L:2/C:2)      |
| H               | Roof material deteriorating water quality                                                                     | Moderate<br>(L:4/C:1) | Monitoring of water quality                         | Moderate<br>(L:4/C:1) |
| H               | Mobilization of toxic substances from carbonates                                                              | Low<br>(L:1/C:2)      | Monitoring of water quality                         | Low<br>(L:1/C:2)      |



**Table S5.: Identified, analysed, and evaluated risks in the MAR operation phase; H: human health risk, T: technical risk; L: Likelihood, C: Severity of consequences.**

| Operation Phase |                                                                                                 |                       |                                                                                              |                       |
|-----------------|-------------------------------------------------------------------------------------------------|-----------------------|----------------------------------------------------------------------------------------------|-----------------------|
| Type            | Potential Risk                                                                                  | Score                 | Mitigation measure                                                                           | Residual Score        |
| T               | Increased carbonate dissolution causing subsidence                                              | Moderate<br>(L:1/C:3) | (Hydro)geochemical and geotechnical studies                                                  | Low<br>(L:1/C:2)      |
| T               | Groundwater flooding due to mounding groundwater table                                          | Moderate<br>(L:2/C:3) | Decommissioning of MAR system during wet season, control borehole to notice high water level | Low<br>(L:2/C:2)      |
| T               | Clogging of drain trench                                                                        | Moderate<br>(L:2/C:3) | -                                                                                            | Moderate<br>(L:2/C:3) |
| T               | Unplanned costs like cleaning of drain trench (No.13’); decommissioning of drain trench (No.7’) | Moderate<br>(L:2/C:3) | Account for economic flexibility in the budget                                               | Low<br>(L:2/C:2)      |

**Table S6.: Identified, analysed, and evaluated risks in the MAR operation phase; H: human health risk, T: technical risk; L: Likelihood, C: Severity of consequences.**

| Distribution Phase |                                             |                       |                                                     |                       |
|--------------------|---------------------------------------------|-----------------------|-----------------------------------------------------|-----------------------|
| Type               | Potential Risk                              | Score                 | Mitigation measure                                  | Residual Score        |
| H                  | Biological contamination of water           | High<br>(L:2/C:4)     | Adjust disinfection measure                         | Moderate<br>(L:2/C:3) |
| H                  | Microbial or algae growth during storage    | Moderate<br>(L:2/C:3) | Adjust storage time or disinfect only after storage | Low<br>(L:1/C:2)      |
| T/H                | Contamination with disinfection by-products | Moderate<br>(L:2/C:3) | Use different disinfection measure                  | Low<br>(L:1/C:2)      |

#### **S4. Costs of reverse osmosis**

A reverse osmosis system was installed in Grand Bahama and the published investment cost was \$5 million (GBUC, 2021). This value was considered as a lumped sum of the measure's costs, but no detailed information on the types of costs was found. This lumped sum did not include operation costs. Therefore, the operation costs were estimated through a literature review on studies and publications describing similar projects (Abbasighadi, 2013; CDM, 2011; Sarica, 2018).

#### **S5. Costs of Rooftop rainwater harvesting (RRWH)**

Experts of the company Phoenix Engineer (M. Gomez, personal communication, April 14, 2022) provided the necessary information to estimate the investment and operation costs of the RRWH system.

The size of the gutter system was calculated by using the following information:

- the average length of the roof buildings, which was derived from the average roof area of the buildings in Wellfield 1 (221 m<sup>2</sup>) and in Wellfields 3 and 4 (347 m<sup>2</sup>);
- the assumption of a squared roof;
- planning the presence of four gutter sections per house.

The costs of the gutter system were estimated by using the following information:

- the fact that vinyl gutters have average lifespan of 25 years (Gutter professionals, 2017);
- the assumption that all buildings have one floor with an average height of 3 m;
- the average estimation of one soakaway excavation per building,
- the estimation of the total volume of gravel to be removed: corresponding to 23.8 m<sup>3</sup> for the buildings in Wellfield 1 and 37.4 m<sup>3</sup> for the buildings in Wellfields 3 and 4.

Table S7 describes the costs per unit used to estimate the operation costs, like the maintenance of the system or the service of experts to replace gutters.

**Table S7. Basis for estimating investment and operation costs of the RRWH system.**

| Type of cost                                 | Price    | Unit       | Comment                                                       |
|----------------------------------------------|----------|------------|---------------------------------------------------------------|
| <b>Project management and administration</b> |          |            |                                                               |
| Experts in the installation of the system    | 190.00   | \$ / hour  | 16-hour installation per house, suggested by Phoenix Engineer |
| <b>Preparation of the project</b>            |          |            |                                                               |
| Water quality analysis                       | 160.00   | \$ / hour  | Assumption of 40 hours                                        |
| <b>Implementation of works and equipping</b> |          |            |                                                               |
| Gutter (vinyl)                               | 15.00    | \$ / ft    | Length based on the average size of roof                      |
| Distribution piping                          | 10.50    | \$ / ft    | Length based on average height of one floor house             |
| Filter                                       | 161.29   | \$ / unit  | Self-cleaning filter from (Rainy, 2023)                       |
| Excavation soakaway                          | 4,500.00 | \$ / unit  | One soakaway per house                                        |
| Gravel                                       | 26.40    | \$ / ton   | Stone 3/8’’                                                   |
| <b>Operation</b>                             |          |            |                                                               |
| Maintenance of system                        | 500.00   | \$ / month |                                                               |
| Experts in replacement of gutters            | 190.00   | \$ / hour  | Vinyl gutters have a lifetime of 25 years                     |
| Regular water quality analysis               | 160.00   | \$ / hour  | Assumption of two days per month                              |

## S6. Costs of reforestation

Jantawong et al. (2022) reported reforestation costs according to the initial stocking density. We combined these data with the number of trees in the reforestation area, information that was derived from the extent of the measure and from expert-based knowledge from Turks & Caicos Island Government (B. N. Manco, personal communication, April 1, 2022). As a result, we estimated that the reforestation would involve 1000 trees per hectare.

Table S8 displays the costs for the pre-planting phase, tree planting and operation. Tree production costs were assumed to be null, as the ongoing project “Establishment of a seedling nursery and replanting for forest recovery on Grand Bahama” would cover these costs by implementing a nursery for forest recovery (University of The Bahamas, 2021). We assumed two tree-planting events of the project (one for the first and one for the second year), where all saplings would be planted in the reforestation sites. For the maintenance costs, we assumed that weeding and fertilizer application would take place for two years, and that also tree-growth monitoring is needed for two years from planting.

**Table S8. Basis for estimating investment and operation costs of the reforestation scenarios from Jantawong et al. (2022)**

| Type of cost             | Year 1   | Year 2   | Unit    |
|--------------------------|----------|----------|---------|
| <b>Pre-planting</b>      |          |          |         |
| Site preparation         | 244.10   | -        | \$ / ha |
| Pre-planting site survey | 13.07    | -        | \$ / ha |
| <b>Tree planting</b>     |          |          |         |
| Planting                 | 2,346.20 | 1,218.59 | \$ / ha |
| Materials and equipment  | 253.80   | 129.03   | \$ / ha |
| Labour                   | 874.00   | 546.56   | \$ / ha |
| Transportation           | 99.55    | 23.94    | \$ / ha |
| <b>Operation</b>         |          |          |         |
| Maintenance              | 1,398.36 | 693.97   | \$ / ha |
| Monitoring               | 54.19    | 31.04    | \$ / ha |

## References

- Abbasighadi, A.: A Cost-Benefit Analysis of a Reverse Osmosis Desalination Plant with and without Advanced Energy Recovery Devices, Institute of Graduate Studies and Research, North Cyprus, 2013.
- Bahamas Ministry of Tourism: Expenditure: Yearly Expenditure Comparisons By Qtr & Visitor Type, 2022.
- CDM Camp Dresser & McKee Inc.: Groundwater Supply , Sustainability Yield and Storm Surge Vulnerability, 2011.
- DEEPQWATER-CE: Common methodological guidance for DEEPQWATER-CE MAR pilot feasibility studies: <https://www.interreg-central.eu/Content.Node/DEEPQWATER-CE.html>, 2020.
- Department of Statistics The Bahamas: The Commonwealth of The Bahamas: Cenus of Population and Housing 2010, 197 pp., 2012.
- DIN Deutsche Institut für Normung e.V.: Geotechnical investigation and testing - Laboratory testing of soil - Part 4: Determination of particle size distribution (ISO 17892-4:2016); German version EN ISO 17892-4:2016, <https://doi.org/https://dx.doi.org/10.31030/2362539>, 2017.
- DIN Deutsche Institut für Normung e.V.: Rainwater harvesting systems Part 1: Planning, installation, operation and maintainance DIN 1989-1:2002-04, 2002.
- Dokou, Z., Al Baghdadi, L., Mazzoni, N., Moxey, A., and Nikolopoulos, E. I.: The impact of hurricane Dorian on freshwater resources of Grand Bahama island, in: American Geophysical Union, Fall Meeting, 2020.
- Donagh, P. Mac, Roll, J., Hahn, G., and Cabbage, F.: Timber Harvesting Production, Costs, Innovation, and Capacity in the Southern Cone and the U.S. South, in: Timber Buildings and Sustainability, edited by: Concu, G., InTech, 2019.
- Esri: Esri 2020 Land Cover, 2021.
- European Commission: Guide to cost-benefit analysis of investment projects: Economic appraisal tool for cohesion policy 2014-2020, European Union, Luxembourg, 2015.
- Eurostat: EU-DEM (LAEA), GISCO, 2013.
- Fick, S. E. and Hijmans, R. J.: WorldClim 2: new 1km spatial resolution climate surfaces for global land areas, *International Journal of Climatology*, 37, 4302–4315, 2017.
- Flory, B.: Updating the Discount Rate Used for Benefit-Cost Analysis at Seattle Public Utilities- Draft, Municipal Research and Services Center, 2013.
- Forest New South Wales: The pine plantation rotation: [https://www.forestrycorporation.com.au/\\_\\_data/assets/pdf\\_file/0009/238473/pine-plantation-rotation.pdf](https://www.forestrycorporation.com.au/__data/assets/pdf_file/0009/238473/pine-plantation-rotation.pdf).
- GBUC: Metering, Rates & Tariffs: Current Rates & Charges: <https://grandbahamautility.com/account-billing/rates/>, 2022.
- GBUC Public Relations: \$5 million Reverse Osmosis System for Grand Bahama completed by GBUC, 2021.
- Gutter professionals: How Long Should a Gutter System Last? <https://gutterprofessionalsinc.com/how-long-should-a-gutter-system-last/>, 2017.

- Imig, A., Szabó, Z., Halytsia, O., Vracholi, M., Kleinert, V., and Rein, A.: A review on risk assessment in managed aquifer recharge, *Integrated Environmental Assessment and Management*, 18, 1513–1529, <https://doi.org/10.1002/ieam.4584>, 2022.
- IPCC: IPCC Guidelines for National Greenhouse Gas Inventories: Volume 4: Agriculture, Forestry and Other Land Use, Eggleston., 2006.
- IPCC: 2013 Supplement to the 2006 IPCC Guidelines for National Greenhouse Gas Inventories: Wetlands, Hiraishi., IPCC, Switzerland, 2014.
- Jantawong, K., Kavinchan, N., Wangpakapattanawong, P., and Elliott, S.: Financial Analysis of Potential Carbon Value over 14 Years of Forest Restoration by the Framework Species Method, *Forests*, 13, 144, <https://doi.org/10.3390/f13020144>, 2022.
- Le, H. D., Smith, C., and Herbohn, J.: What drives the success of reforestation projects in tropical developing countries? The case of the Philippines, *Global Environmental Change*, 24, 334–348, <https://doi.org/10.1016/j.gloenvcha.2013.09.010>, 2014.
- Little, B., Buckley, D., Cant, R., Henry, P., Jefferiss, A., Mather, J., Stark, J., and Young, R.: Land resources of the Bahamas: a summary, Land Resources Division, Ministry of Overseas Development, England, 143 pp., 1977.
- Miller, I., Russel, C., and Daniels, M.: Cost Benefit Analysis of Casuarina Species Management on Eleuthera Island, The Bahamas - Governor’s Harbour Airport: A Case Study, in: *Economic Impact of IAS in The Caribbean: Case Studies*, edited by: CABI, 12–29, 2014.
- Myers, R., D. Wade, and C. Bergh: Fire Management Assessment of the Caribbean Pine (*Pinus caribea*) Forest Ecosystems on Andros and Abaco Islands, Bahamas: GFI publication no. 2004-1., 2004.
- Nadebaum, P., Chapman, M., Morden, R., and Rizak, S.: A Guide To Hazard Identification & Risk Assessment For Drinking Water Supplies, 116 pp., 2004.
- Rainy: “Rainy” filters RF80: <https://www.rainyfilters.com/products/rainy-filters>, 2023.
- Ruesch, A. and Gibbs, H. K.: Global ecofloristic zones mapped by the United Nations Food and Agricultural Organization, 2008.
- Sanchez, M.: Conservation genetics and biogeography of the Caribbean pine (*Pinus caribaea* var. *bahamensis*) in the Bahaman archipelago, Birbeck University of London, 276 pp., 2020.
- Sarica, A.: Cost-benefit Analysis of Water Production with Seawater Reverse Osmosis System: A Case study for Mersin Free Zone and International Port, *International Journal of Economics and Financial Issues*, 8, 142–147, 2018.
- Sharp, R., Tallis, H. T., Ricketts, T., Guerry, A. D., Wood, S. A., Chaplin-Kramer, R., Nelson, E., Ennaanay, D., Wolny, S., Olwero, N., Vigerstol, K., Pennington, D., Mendoza, G., Aukema, J., Foster, J., Forrest, J., Cameron, D., Arkema, K., Lonsdorf, E., Kennedy, C., Verutes, G., Kim, C. K., Guannel, G., Papenfus, M., Toft, J., Marsik, M., Bernhardt, J., Griffin, R., Glowinski, K., Chaumont, N., Perelman, A., Lacayo, M., Mandle, L., Hamel, P., Vogl, A. L., Rogers, L., and Bierbower, W.: InVEST 3.3.1. User’s Guide, 2015.
- Smith, P., Bustamante, M., Ahammad, H., Clark, H., Dong, H., Elsiddig, E. A., Haberl, H., Harper, R., House, J., Jafari, M., Masera, O., Mbow, C., Ravindranath, N. H., Rice, C. W., Robledo Abad, C., Romanovskaya, A., Sperling, F., and Tubiello, F.: Agriculture, Forestry and Other Land Use (AFOLU), in: *Climate Change 2014: Mitigation of Climate Change. Contribution of Working Group III to the Fifth Assessment Report of the Intergovernmental Panel on Climate*

Change, edited by: Edenhofer, O., R. Pichs-Madruga, Y. Sokona, E. Farahani, S. Kadner, K. Seyboth, A. Adler, I. Baum, S. Brunner, P. Eickemeier, B. Kriemann, J. Savolainen, S. Schlömer, C. von Stechow, T. Zwickel and J.C. Minx, Cambridge, United Kingdom and New York, NY, USA, 811–922, 2014.

Swierc, J., Page, D., and Leeuwen, J. Van: Preliminary Hazard Analysis and Critical Control Points Plan ( HACCP ) - Salisbury Stormwater to Drinking Water Aquifer Storage Transfer and Recovery ( ASTR ) Project of Montana, Water (Basel), 2005.

Wood - Densities of Various Species: [https://www.engineeringtoolbox.com/wood-density-d\\_40.html](https://www.engineeringtoolbox.com/wood-density-d_40.html)  
[https://www.engineeringtoolbox.com/wood-density-d\\_40.html](https://www.engineeringtoolbox.com/wood-density-d_40.html).

The World Bank: State and Trends of Carbon Pricing 2021, Washington, DC, 2021.

The Engineering ToolBox: Wood - Densities of Various Species [WWW Document].

URL [https://www.engineeringtoolbox.com/wood-density-d\\_40.html](https://www.engineeringtoolbox.com/wood-density-d_40.html) [https://www.engineeringtoolbox.com/wood-density-d\\_40.html](https://www.engineeringtoolbox.com/wood-density-d_40.html), 2004.

University of The Bahamas: Establishment of a seedling nursery and replanting for forest recovery on Grand Bahama: Grant Proposal Submitted to the Bahamas Protected Areas Fund, 2021.

US EPA United States Environmental Protection Agency: Decentralized Systems Technology Fact Sheet, US Environmental Protection Agency Washington, D.C., 1–4, 1999.

Wang, W., Mu, J. E., and Ziolkowska, J. R.: Perceived Economic Value of Ecosystem Services in the US Rio Grande Basin, Sustainability, 13, 13798, <https://doi.org/10.3390/su132413798>, 2021.

Wood Resources International: Pulpwood Price Indices: <https://woodprices.com/pulpwood-price-indices/>, 2019.
